# Supplementary material
Source: PubMed Central journal article supplement (PMC2651737)
Supplement: np8001628-File001.pdf [file np8001628-File001.pdf]

# S1 Supporting Information Contents Page

**Title:** Spheciosterol Sulfates, PKC $\zeta$  Inhibitors from a Philippine Sponge  
*Spheciospongia* sp.

**Authors:** Emily L. Whitson, Tim S. Bugni, Priya S. Chockalingam, Gisela P. Concepcion, Mary Kay Harper, Min He, John N. A. Hooper, Gina C. Mangalindan, Frank Ritacco, Chris M. Ireland

## **Contents:**

- S2  $^1\text{H}$  NMR Spectrum of Spheciosterol Sulfate A (**1**) in  $\text{CD}_3\text{OD}$
- S3  $^{13}\text{C}$  NMR Spectrum of Spheciosterol Sulfate A (**1**) in  $\text{CD}_3\text{OD}$
- S4  $^1\text{H}$  NMR Spectrum of Spheciosterol Sulfate B (**2**) in  $\text{CD}_3\text{OD}$
- S5 gHSQC NMR Spectrum of Spheciosterol Sulfate B (**2**) in  $\text{CD}_3\text{OD}$
- S6  $^1\text{H}$  NMR Spectrum of Spheciosterol Sulfate C (**3**) in  $\text{CD}_3\text{OD}$
- S7 gHSQC NMR Spectrum of Spheciosterol Sulfate C (**3**) in  $\text{CD}_3\text{OD}$
- S8  $^1\text{H}$  NMR Spectrum of Topsentiasterol Sulfate E (**4**) in  $\text{CD}_3\text{OD}$
- S9  $^{13}\text{C}$  NMR Spectrum of Topsentiasterol Sulfate E (**4**) in  $\text{CD}_3\text{OD}$
- T1  $^1\text{H}$  and  $^{13}\text{C}$  data for Topsentiasterol Sulfate E (**4**) in  $\text{CD}_3\text{OD}$

# S2 $^1\text{H}$ NMR Spectrum for Spheciosterol Sulfate A (1) in $\text{CD}_3\text{OD}$

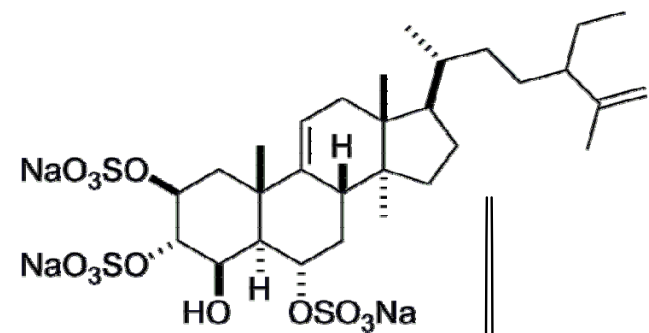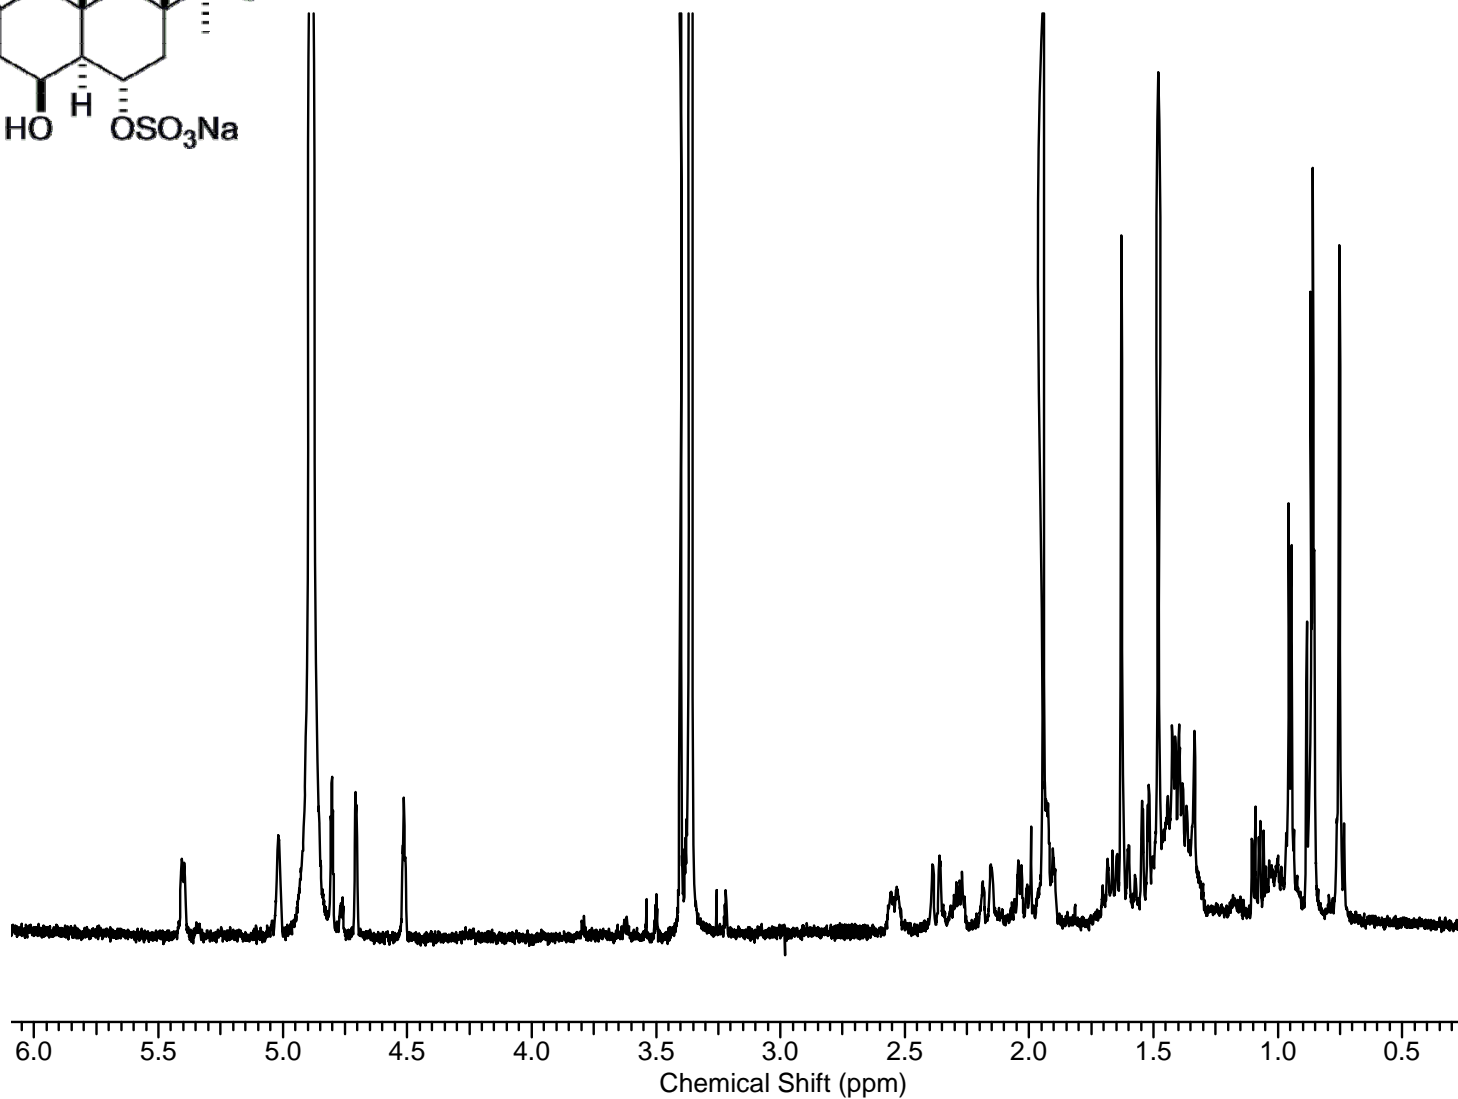

# S3 $^{13}\text{C}$ NMR Spectrum for Spheciosterol Sulfate A (1) in $\text{CD}_3\text{OD}$

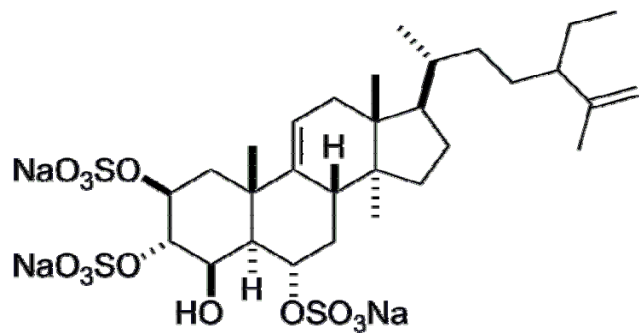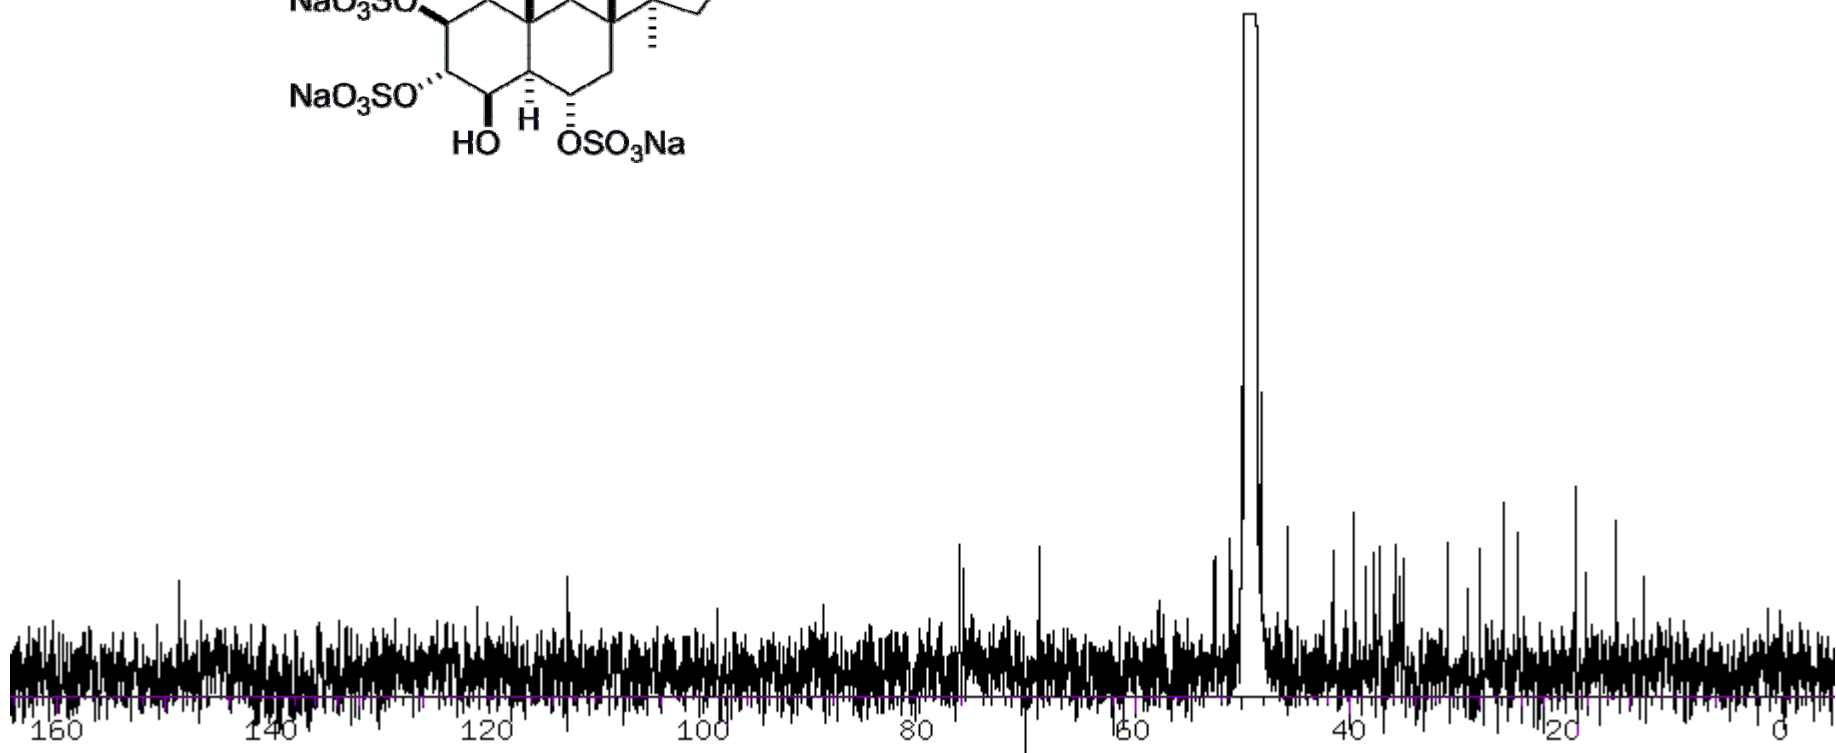

# S4 $^1\text{H}$ NMR Spectrum for Spheciosterol Sulfate B (**2**) in $\text{CD}_3\text{OD}$

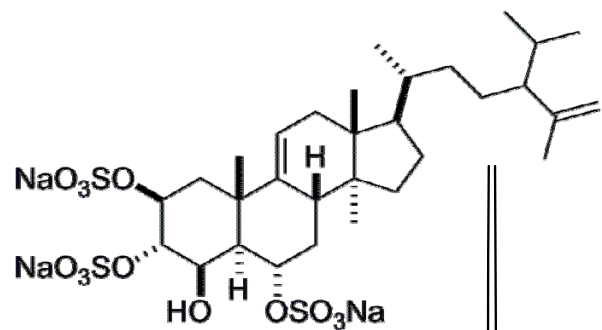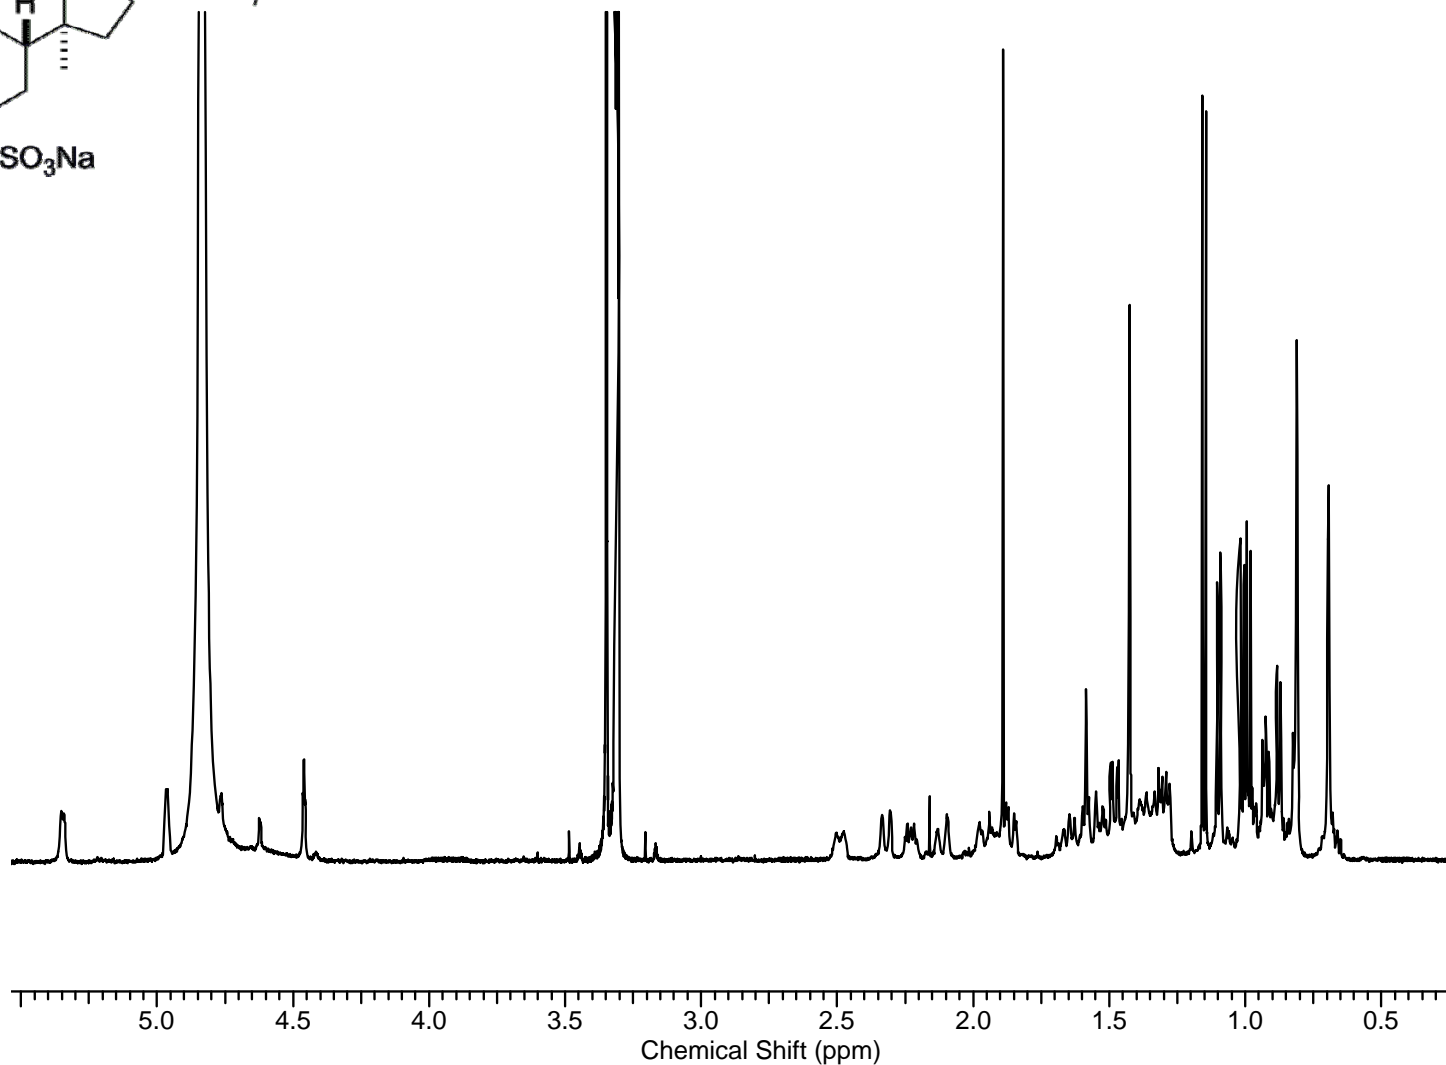

# S5 gHSQC NMR Spectrum for Spheciosterol Sulfate B (2) in CD<sub>3</sub>OD

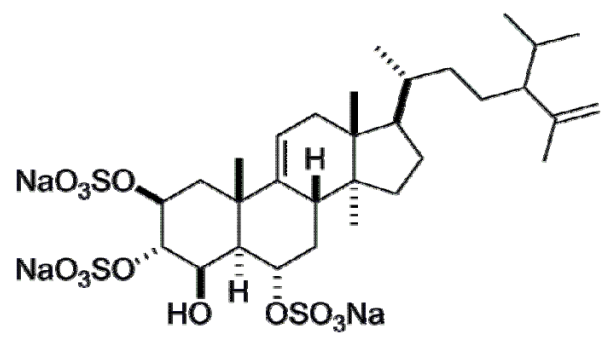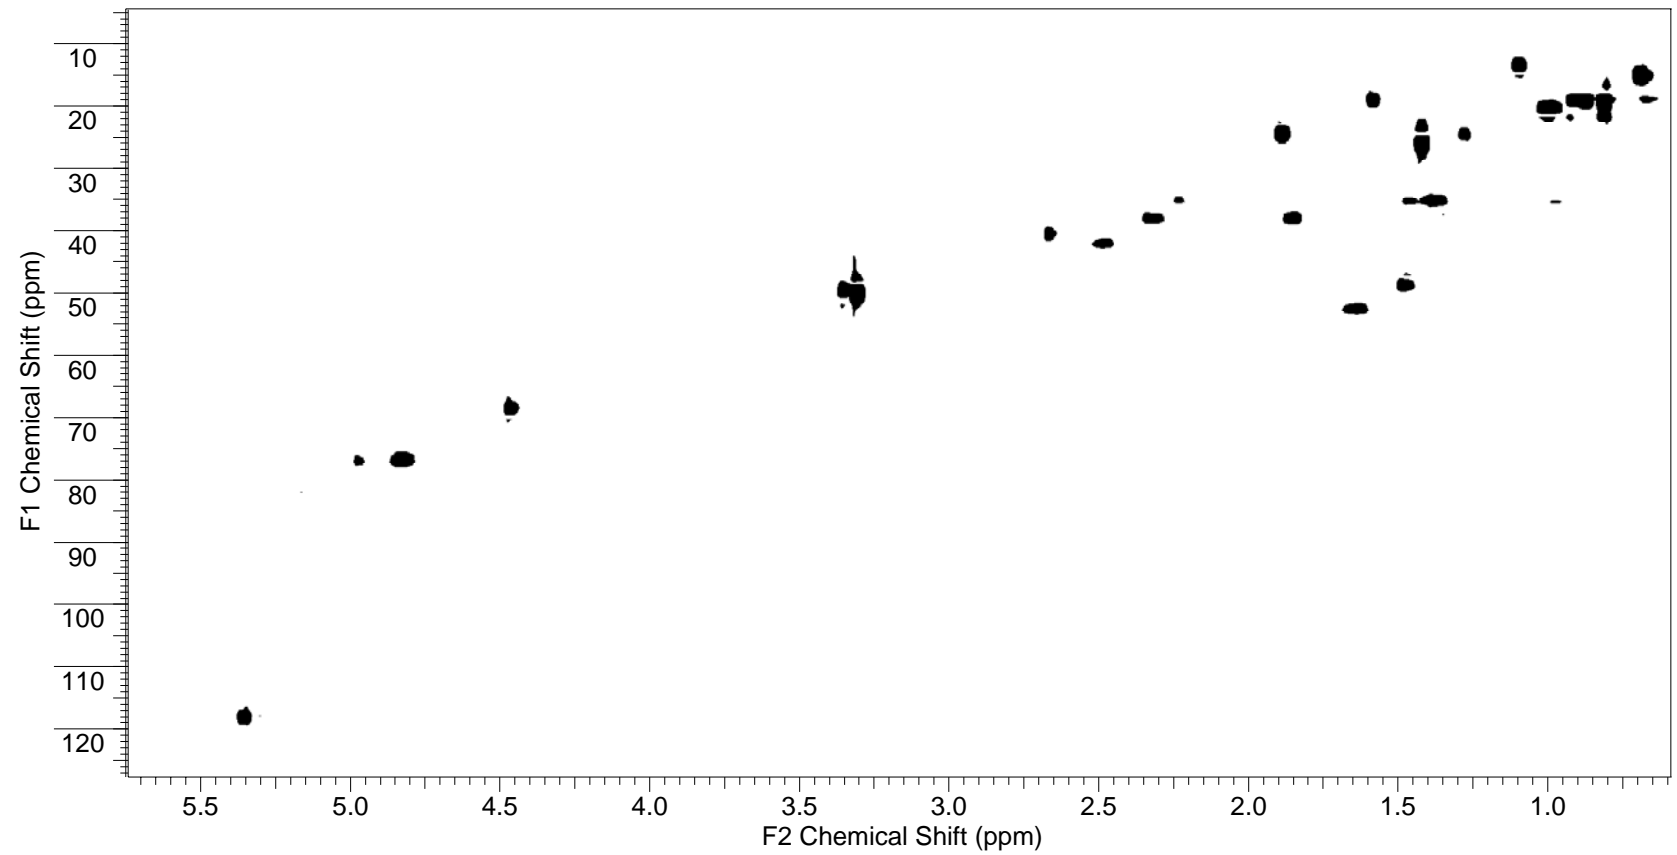

# S6 $^1\text{H}$ NMR Spectrum for Spheciosterol Sulfate C (**3**) in $\text{CD}_3\text{OD}$

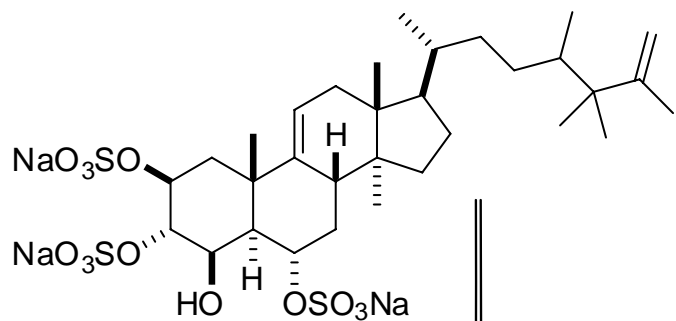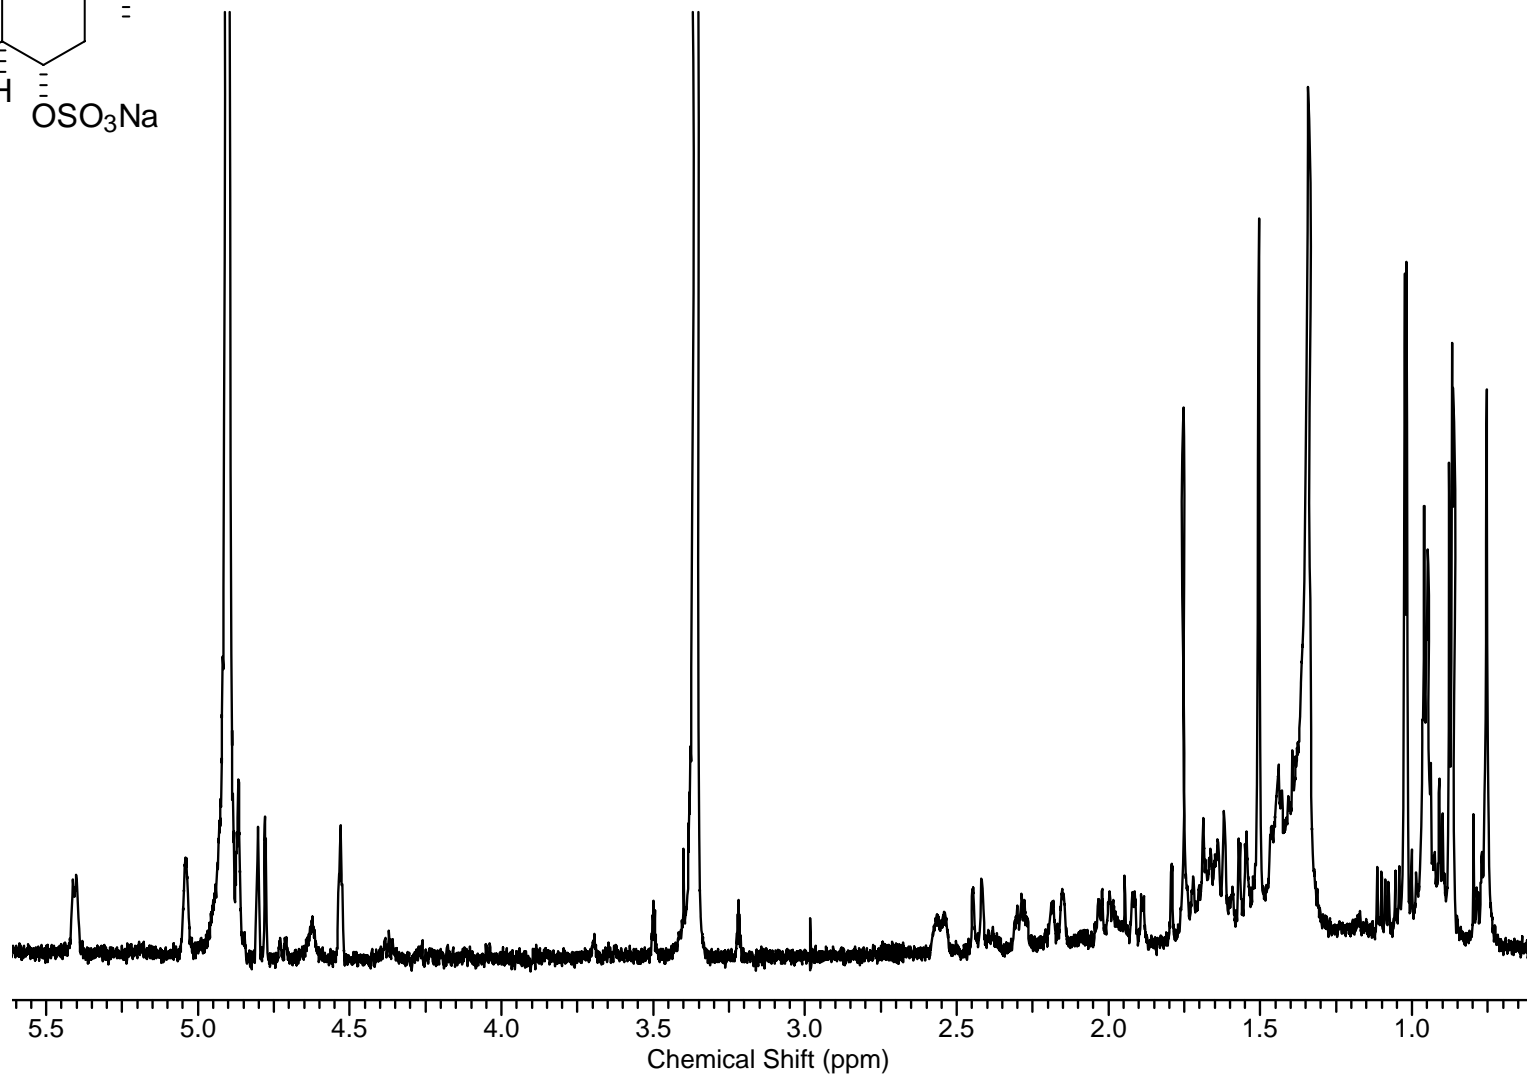

# S7 gHSQC NMR Spectrum for Spheciosterol Sulfate C (3) in CD<sub>3</sub>OD

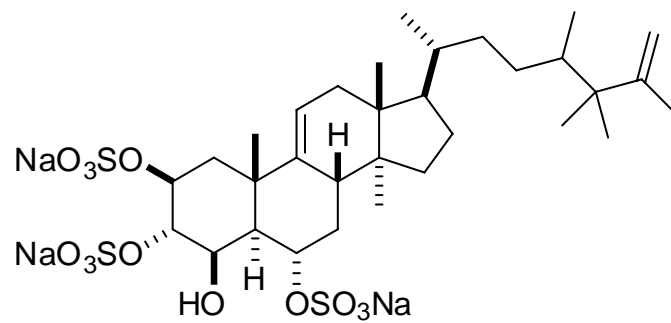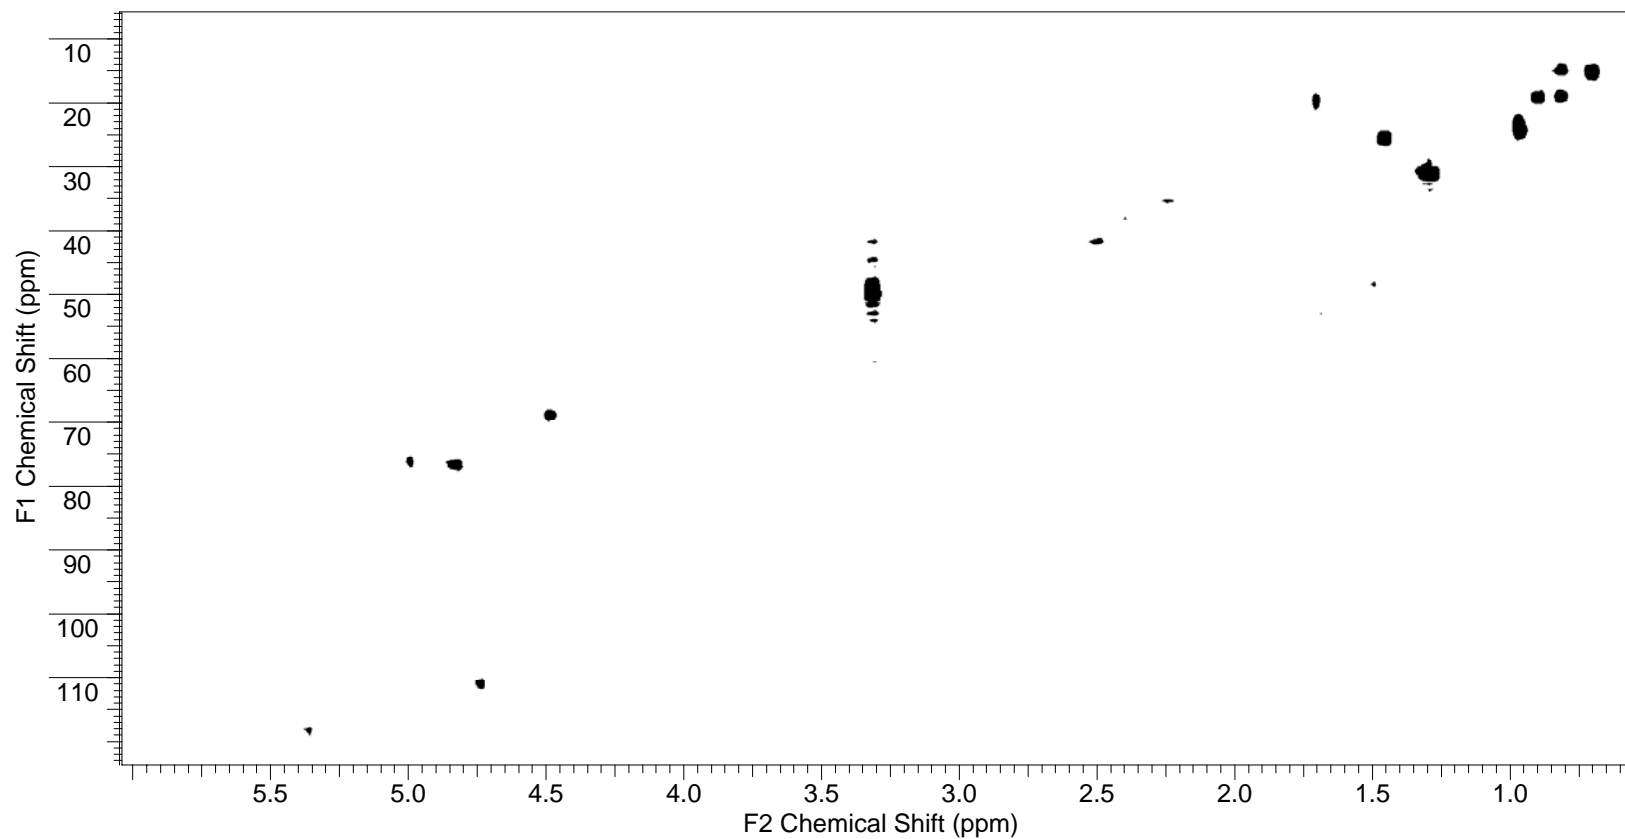

# S8 <sup>1</sup>H NMR Spectrum for Topsentiasterol Sulfate E (**4**) in CD<sub>3</sub>OD

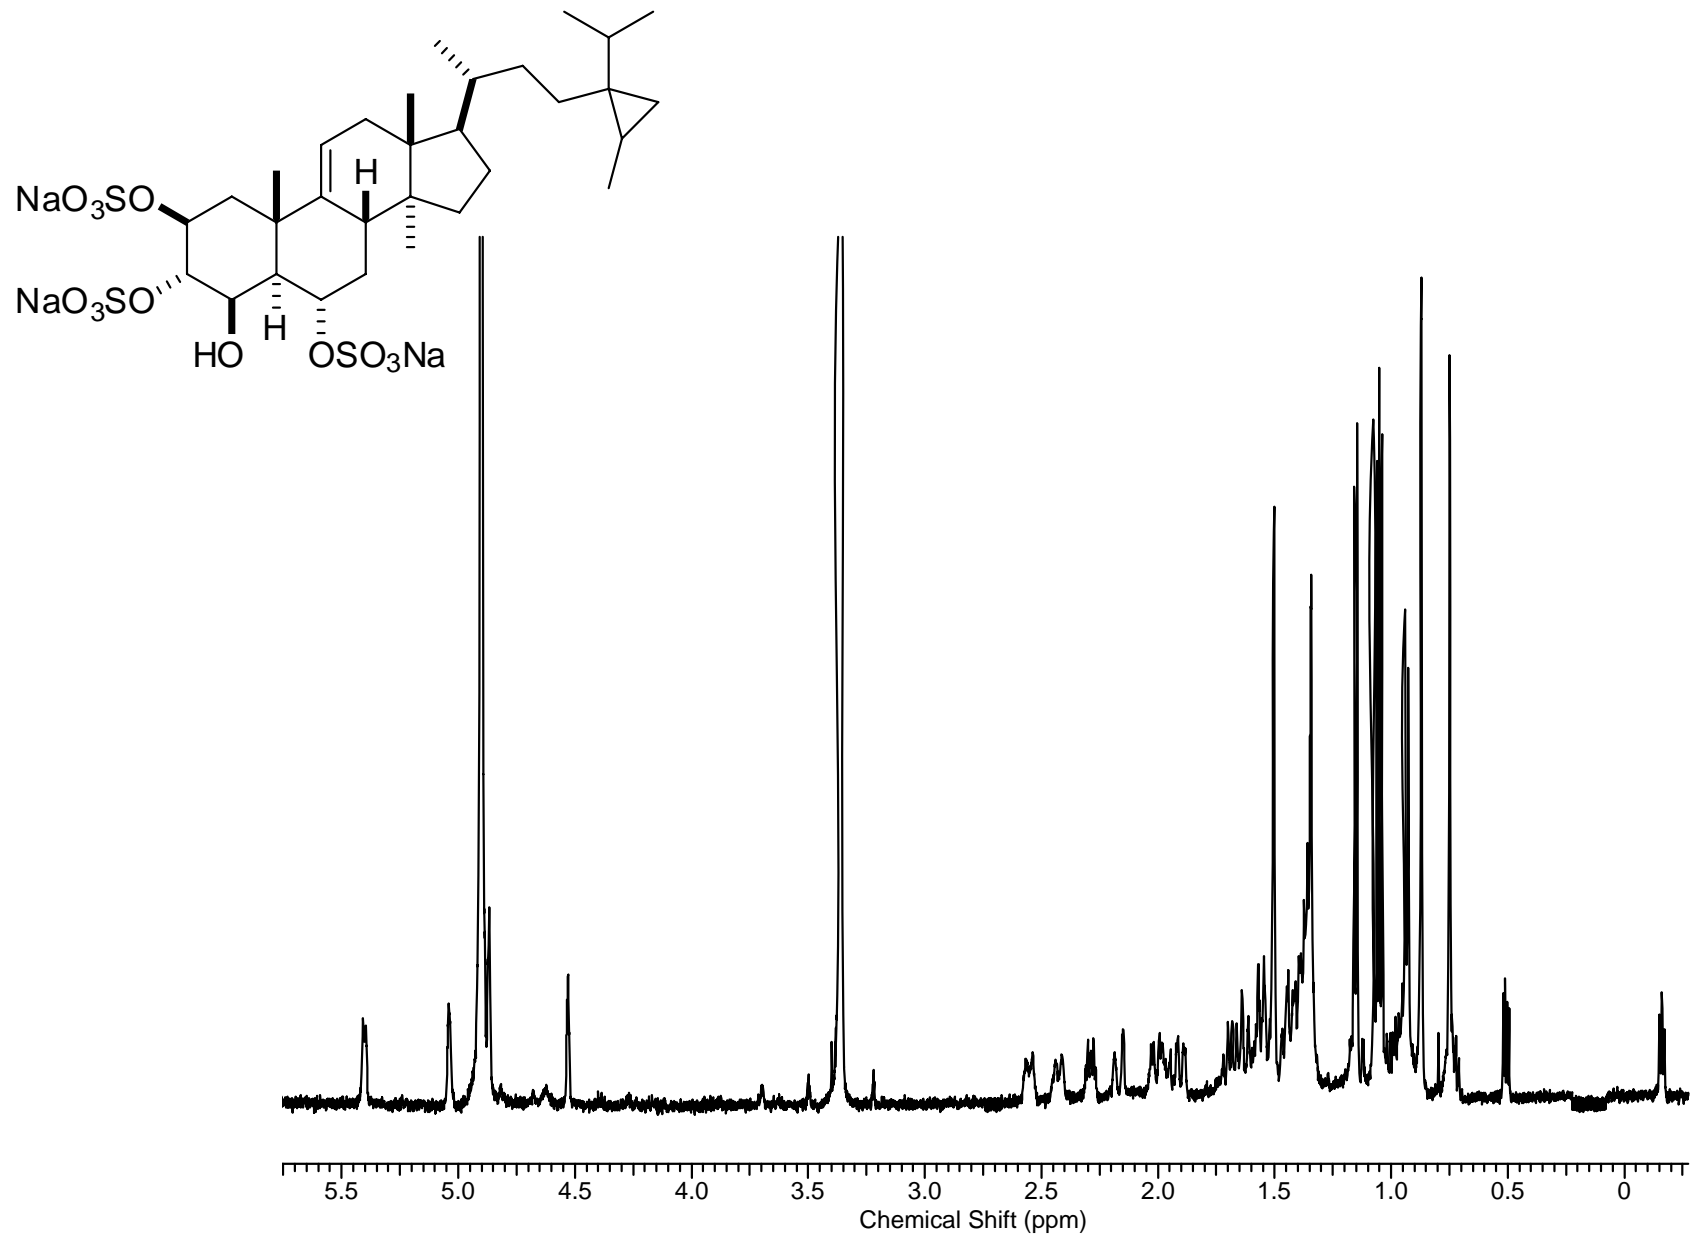



# S9 $^{13}\text{C}$ NMR Spectrum for Topsentiasterol Sulfate E (4) in $\text{CD}_3\text{OD}$

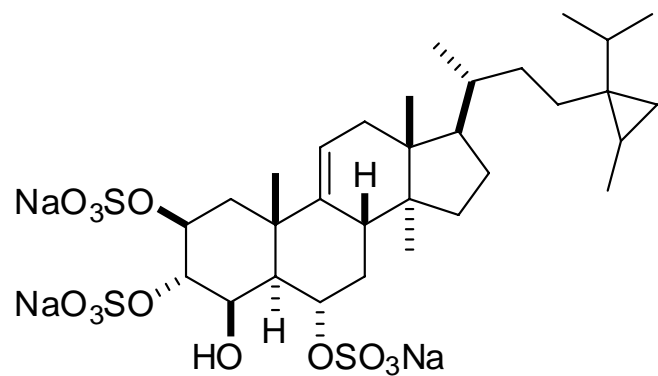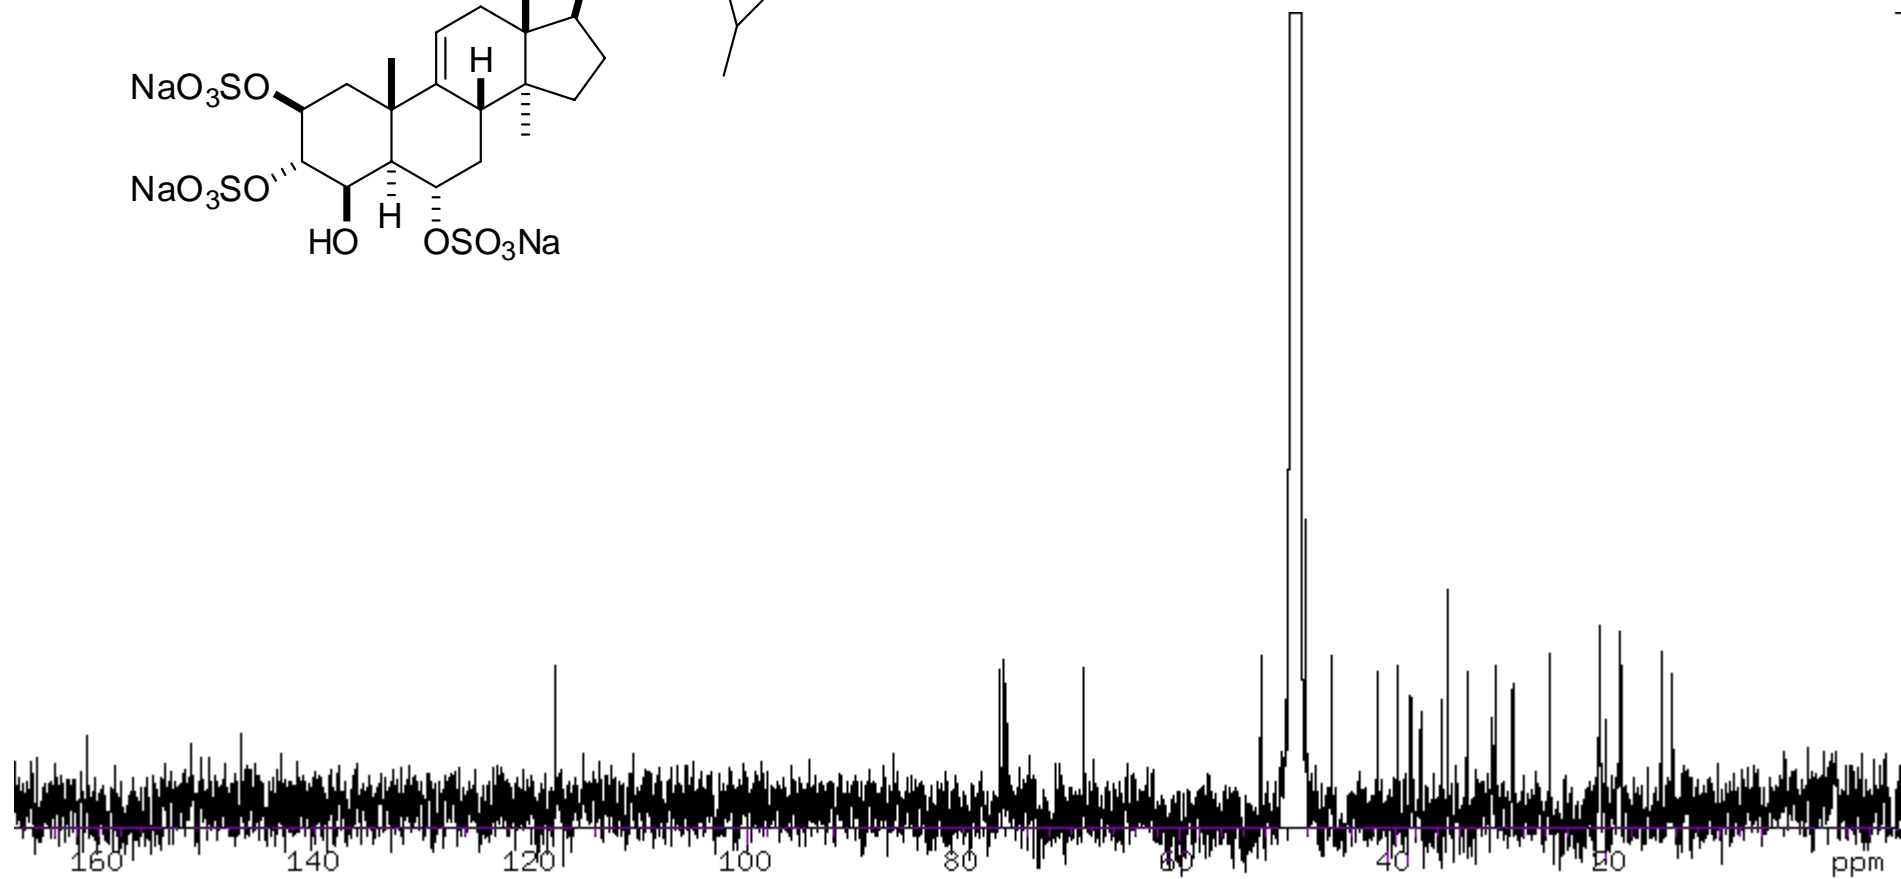

**Supplemental Table 1.** NMR data for topsentiasterol sulfate E (**4**) (500 MHz, CD<sub>3</sub>OD)

| topsentiasterol sulfate E ( <b>4</b> ) |                                  |                     |
|----------------------------------------|----------------------------------|---------------------|
| position                               | $\delta_{\text{H}}$ mult (J, Hz) | $\delta_{\text{C}}$ |
| 1 $\alpha$                             | 1.84, dd (14.8, 4.4)             | 37.2                |
| 1 $\beta$                              | 2.38, br d (14.8)                |                     |
| 2                                      | 4.99, m                          | 75.6                |
| 3                                      | 4.82, dd (2.6, 1.9)              | 76.2                |
| 4                                      | 4.47, dt (3.1, 2.6)              | 68.4                |
| 5                                      | 1.50, dd (11.8, 3.1)             | 47.9                |
| 6                                      | 4.84 <sup>a</sup>                | 76.0                |
| 7 $\alpha$                             | 1.57, m                          | 35.2                |
| 7 $\beta$                              | 2.24, dt (11.3, 4.5)             |                     |
| 8                                      | 2.50, br d (12.5)                | 41.2                |
| 9                                      |                                  | 146.5               |
| 10                                     |                                  | 39.5                |
| 11                                     | 5.35, br d (5.2)                 | 117.4               |
| 12 $\alpha$                            | 2.12, br d(17.6)                 | 38.2                |
| 12 $\beta$                             | 1.95, dd (17.6, 5.8)             |                     |
| 13                                     |                                  | 45.5                |
| 14                                     |                                  | 47.9                |
| 15 $\alpha$                            | 1.40, m                          | 34.6                |
| 15 $\beta$                             | 1.47, m                          |                     |
| 16 $\alpha$                            | 1.92, m                          | 28.8                |
| 16 $\beta$                             | 1.33, m                          |                     |
| 17                                     | 1.63, m                          | 52.0                |
| 18                                     | 0.69, s                          | 14.9                |
| 19                                     | 1.44, s                          | 25.3                |
| 20                                     | 1.30, m                          | 38.1                |
| 21                                     | 0.88, d (6.4)                    | 18.9                |
| 22a                                    | 1.38, m                          | 34.8                |
| 22b                                    | 0.97, m                          |                     |
| 23a                                    | 1.53, m                          | 30.3                |
| 23b                                    | 1.08, m                          |                     |
| 24                                     |                                  | 28.9                |
| 25                                     | 1.30, m                          | 32.7                |
| 26                                     | 1.02, d (7.0)                    | 20.7                |
| 27                                     | 0.99, d (7.0)                    | 20.6                |
| 28                                     | 0.68, m                          | 18.8                |
| 29a                                    | 0.45, dd (8.6, 4.2)              | 20.1                |
| 29b                                    | -0.22, br dd (4.7, 4.2)          |                     |
| 30                                     | 1.10, d (7.0)                    | 13.9                |
| 31                                     | 0.81, s                          | 18.7                |

<sup>a</sup>overlapped with HOD signal
